# Supplementary material
Source: ML conference proceedings conference paper supplement (https://openreview.net/forum?id=2GqZFx2I7s)

## Supplementary Material

This section evaluates some visual results using the same scene.

**Fig. 1:** Comparison of different imaging techniques under varying levels of light saturation. The columns represent three different methods: Saturated, Modulo, and Recovery. The rows illustrate the results for different values of the scaling factor  $\alpha$ , ranging from 1.5 to 8.

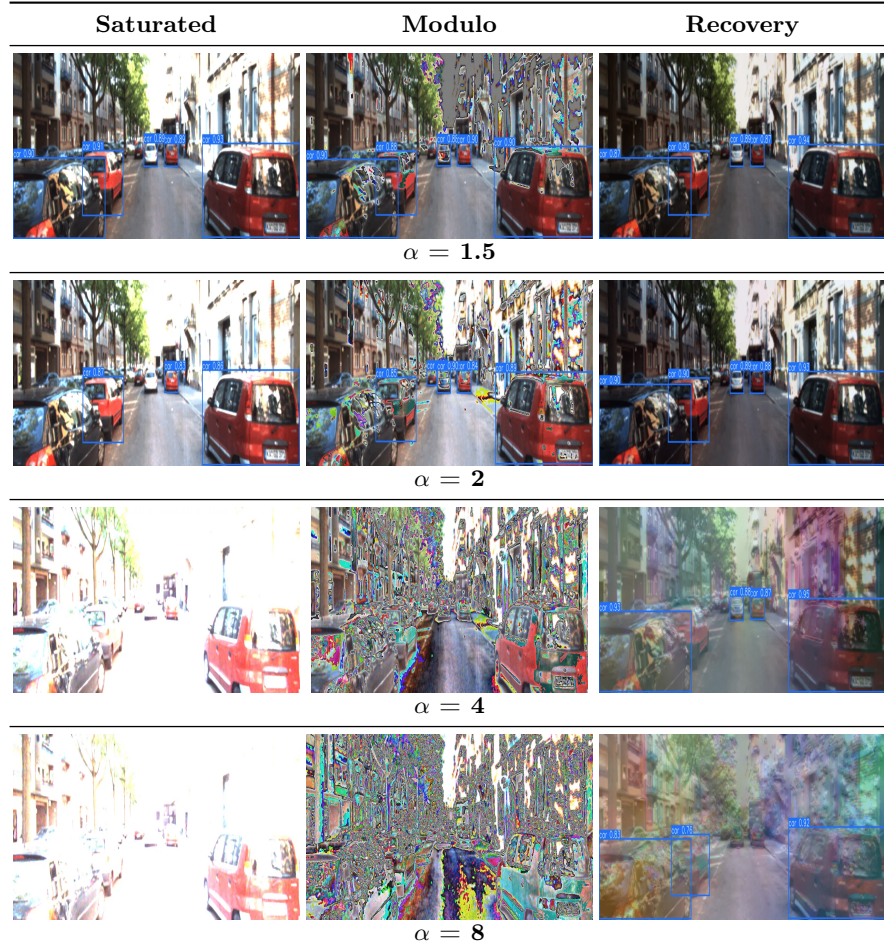

Supplement: supplementary_material [file attachment]
